# Supplementary material
Source: publisher figshare collection journal article supplement (https://gsapubs.figshare.com/ndownloader/files/38296665)
Supplement: Supplementary file 1 [file 38296665]

Supplementary Information Table T2 - Uncertainty values of the input primary variables for the Mediterranean water mass model provided by the MEDSEA_MULTIYEAR_PHY_006_004 CMEMS product.

| Depth below  sea level  (m) | Temperature  (± °C) | Salinity  (±ppm) |
| --- | --- | --- |
| 0 – 10 | 0.7 | 0.47 |
| 10 – 100 | 0.85 | 0.21 |
| 100 – 500 | 0.28 | 0.08 |
| 500 – 1500 | 0.11 | 0.047 |
| 1500 – 2000 | 0.045 | 0.032 |
| 2000 – 2500 | 0.058 | 0.046 |
